# Supplementary material for: Metabolic Dysfunction-Associated Fatty Liver Disease (MAFLD) Is Associated with Cervical Stromal Involvement in Endometrial Cancer Patients: A Cross-Sectional Study in South China
Source: MDPI journal article supplement (doi:10.3390/curroncol30040287), 2023-03-29
Supplement: s1 [file s1]

Supplementals

# Metabolic Dysfunction-Associated Fatty Liver Disease (MAFLD) Is Associated with Cervical Stromal Involvement in Endometrial Cancer Patients: A Cross-Sectional Study in South China

Xite Lin <sup>1,2,3,†</sup>, Chunxia Chen <sup>4,†</sup>, Tingting Jiang <sup>1,2,3</sup>, Jincheng Ma <sup>1,2,3</sup>, Lixiang Huang <sup>1,2,3</sup>, Leyi Huang <sup>1,2,3</sup>, Huifang Lei <sup>1</sup>, Yao Tong <sup>1</sup>, Guanxiang Huang <sup>1,2,3</sup>, Xiaodan Mao <sup>1,2,3,\*</sup> and Pengming Sun <sup>1,2,3,\*</sup>

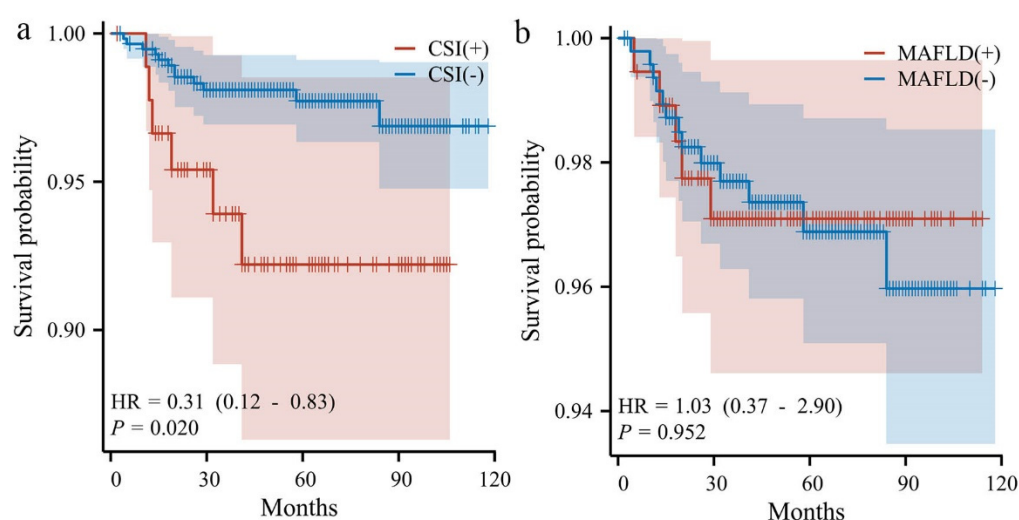

**Figure S1.** a. Kaplan-Meier (KM) survival curves of CSI (-) and CSI (+) groups. b. Kaplan-Meier (KM) survival curves of MAFLD (-) and MAFLD(+) groups.

**Table S1.** Comparison of the demographic and clinical characteristics among Endometrial cancer patients with and without MAFLD.

| Characteristic          | Non-MAFLD         | MAFLD             | P        |
|-------------------------|-------------------|-------------------|----------|
| n                       | 524               | 201               |          |
| Age, median (IQR)       | 53 (48, 59)       | 55 (50, 60)       | 0.015*   |
| BMI, median (IQR)       | 23.4 (21.6, 25.9) | 25.9 (23.9, 28.0) | < 0.001* |
| Menopause status, n (%) |                   |                   | 0.834    |
| Premenopausal           | 247 (47.1%)       | 93 (46.3%)        |          |
| Postmenopausal          | 277 (52.9%)       | 108 (53.7%)       |          |
| FIGO stage, n (%)       |                   |                   | 0.056    |
| I                       | 117 (22.3%)       | 32 (15.9%)        |          |
| II-IV                   | 407 (77.7%)       | 169 (84.1%)       |          |
| Histologic grade, n (%) |                   |                   | 0.367    |
| G1                      | 248 (47.3%)       | 103 (51.2%)       |          |
| G2                      | 163 (31.1%)       | 69 (34.3%)        |          |
| G3                      | 49 (9.4%)         | 13 (6.5%)         |          |
| CSI, n (%)              |                   |                   | 0.027*   |
| No                      | 86 (16.4%)        | 20 (10%)          |          |
| Yes                     | 438 (83.6%)       | 181 (90%)         |          |
| LVSI, n (%)             |                   |                   | 0.243    |

| Characteristic | Non-MAFLD   | MAFLD       | P     |
|----------------|-------------|-------------|-------|
| No             | 470 (89.7%) | 186 (92.5%) | 0.449 |
| Yes            | 54 (10.3%)  | 15 (7.5%)   |       |
| MI, n (%)      |             |             |       |
| <1/2           | 410 (78.2%) | 152 (75.6%) | 0.520 |
| ≥1/2           | 114 (21.8%) | 49 (24.4%)  |       |
| LNM, n (%)     |             |             |       |
| No             | 270 (51.5%) | 115 (57.2%) | 0.520 |
| Yes            | 30 (5.7%)   | 10 (5.0%)   |       |

Note. Data are expressed as median (interquartile range (IQR)), or n (%). \*  $p < 0.05$  was considered to be statistically significant. Abbreviations: MAFLD: metabolic dysfunction-associated fatty liver disease; EC: endometrial cancer; BMI: body mass index; CSI: cervical stromal involvement; LVSI: lymph-vascular space invasion; MI: myometrial invasion; LNM: lymph node metastasis.
